# Supplementary material for: Structural diversity and photoluminescence properties of zinc coordination polymers constructed from 1,4-bis[2-(4-pyridyl)ethenyl]-2,3,5,6-tetramethylbenzene and para-dicarboxylates
Source: Royal Society of Chemistry journal article supplement (doi:10.1039/c4ce01635a), 2014-09-23
Supplement: c4ce01635a1.pdf [file c4ce01635a1.pdf]

## Electronic Supplementary Information (ESI)

### **Structural diversity and photoluminescent properties of zinc coordination polymers constructed from 1,4-bis[2-(4-pyridyl)ethenyl]-2,3,5,6-tetramethylbenzene and para-dicarboxylates**

Yu Ge,<sup>a</sup> Ni-Ya Li,<sup>a</sup> Wei Ma,<sup>a</sup> Dong Liu\*<sup>a</sup> and Xiao-Yan Tang\*<sup>b</sup>

<sup>a</sup> *College of Chemistry and Materials Science, Huaibei Normal University, Huaibei 235000, P. R. China. Fax: 86-561-3806281; E-mail: dongliu@chnu.edu.cn*

<sup>b</sup> *School of Chemistry and Materials Engineering, Changshu Insititute of Technology, Changshu 215500, Jiangsu, P. R. China. E-mail: tangxy@cslg.edu.cn*

## Table of Contents

**Fig. S1** Experimental and simulated PXRD patterns for **1** (a); **2** (b); **3** (c); **4** (d) and **5**(e). .....S3

**Fig. S2** The TGA curves for **1-5**. .....S5

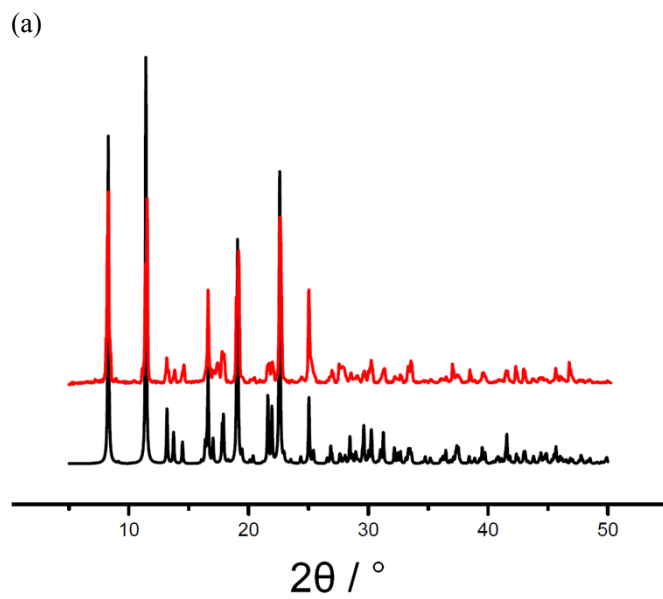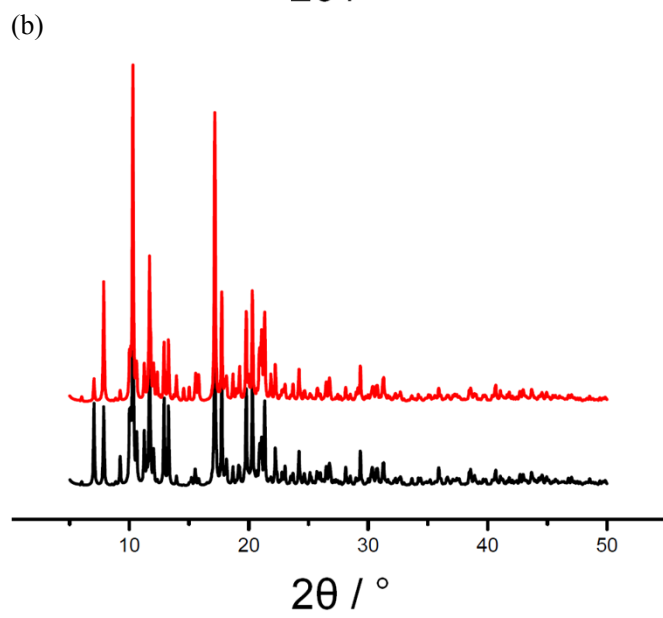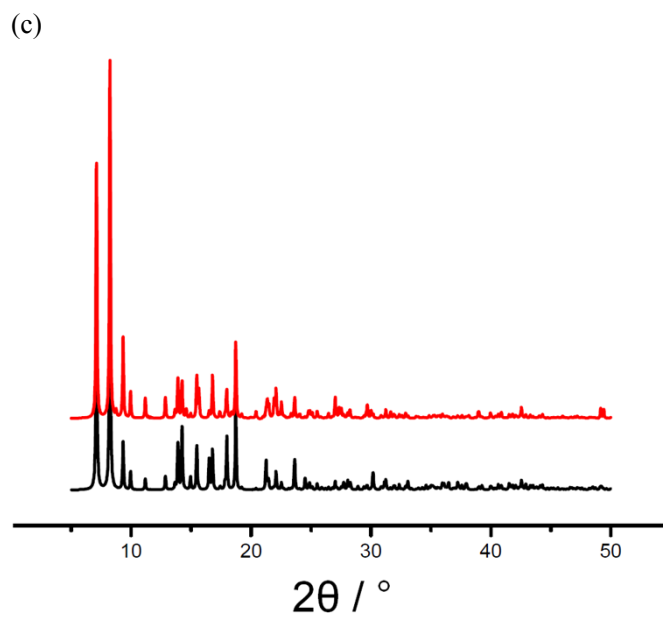

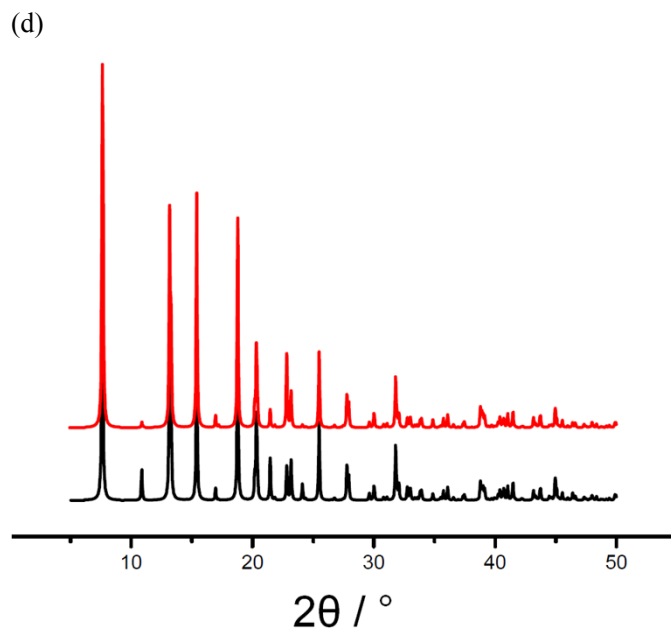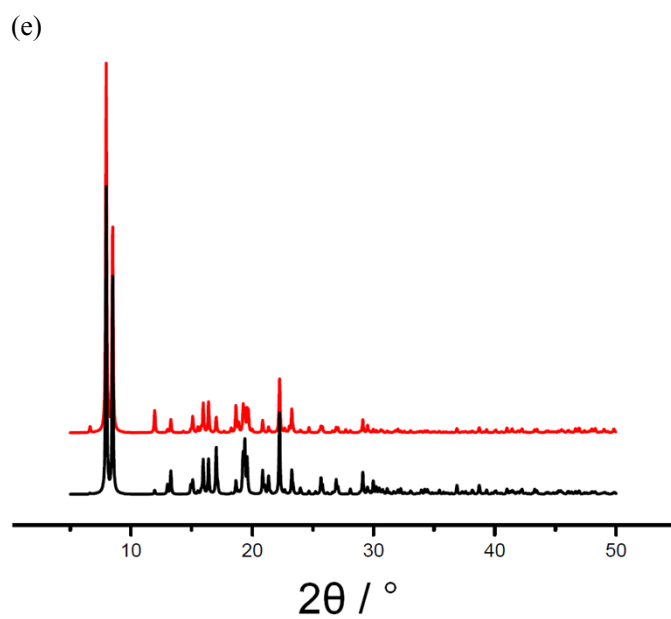

**Fig. S1** PXRD patterns for **1** (a, experimental: red; simulated: black); **2** (b, experimental: red; simulated: black); **3** (c, experimental: red; simulated: black); **4** (d, experimental: red; simulated: black) and **5** (e, experimental: red; simulated: black).

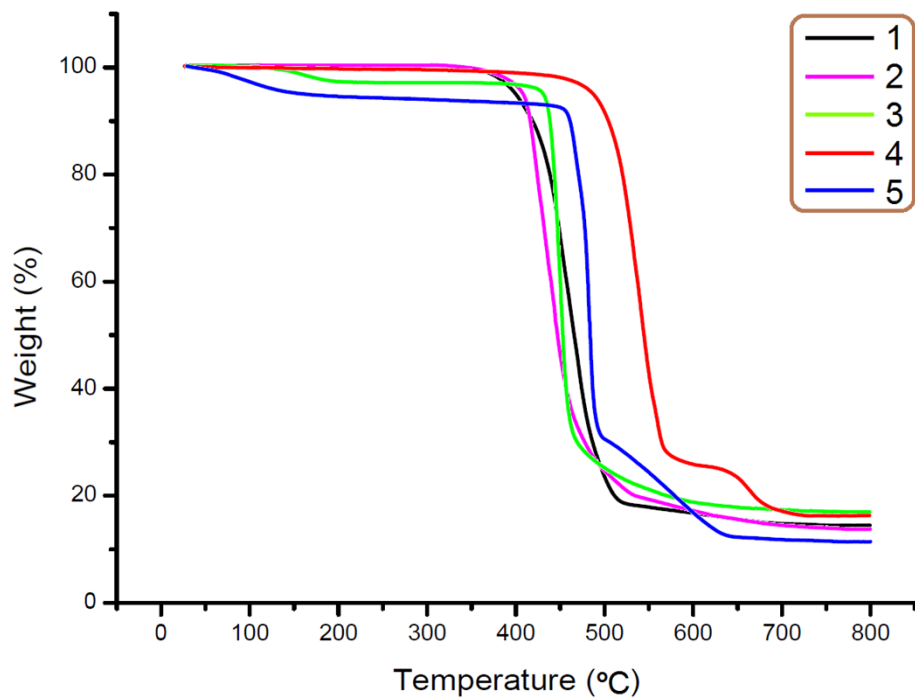

**Fig. S2** The TG curves for 1-5.
